# Supplementary material
Source: publisher figshare collection journal article supplement (https://gsapubs.figshare.com/ndownloader/files/23306729)
Supplement: Supplementary file 1 [file 23306729]

Phillips et al., 2018, Determining the three-dimensional geometry of a dike swarm and its impact on later rift geometry using seismic reflection data: *Geology*, <https://doi.org/10.1130/G39672.1>.

## **Appendix A – Throw-depth analyses**

T-z profiles can elucidate the kinematic history of normal faults (i.e. fault nucleation, growth, and/or reactivation) and thereby the tectonic evolution of sedimentary basins (see Mansfield and Cartwright, 1996; Cartwright et al., 1998 for a full description of the methods used). To assess how the Farsund Dike Swarm may have influenced the post-emplacement evolution of the study area, we calculated throw-depth (T-z) profiles along a number of key faults. We measure the hanging wall and footwall cut-offs of multiple stratigraphic horizons along the faults, plotting the calculated throw at the mid-point between the cut-offs. To accurately constrain the evolution of a fault, all fault slip-related strain must be explicitly recorded; i.e. we must incorporate both ductile (e.g. folding) and brittle (e.g. faulting) components of the strain field associated with fault slip (e.g. Meyer et al., 2002; Long and Imber, 2010; Whipp et al., 2014; Duffy et al., 2015; Jackson et al., 2017). Where fault-parallel folding occurs, hanging wall and footwall cut-offs were defined by projecting the regional dip of the horizon of interest, as measured some distance away from the fault, onto the fault plane.

- Cartwright, J., Bouroulllec, R., James, D., and Johnson, H., 1998, Polycyclic motion history of some Gulf Coast growth faults from high-resolution displacement analysis: *Geology*, v. 26, no. 9, p. 819-822.
- Duffy, O. B., Bell, R. E., Jackson, C. A. L., Gawthorpe, R. L., and Whipp, P. S., 2015, Fault growth and interactions in a multiphase rift fault network: Horda Platform, Norwegian North Sea: *Journal of Structural Geology*, v. 80, p. 99-119.
- Jackson, C. A.-L., Bell, R. E., Rotevatn, A., and Tvedt, A. B. M., 2017, Techniques to determine the kinematics of synsedimentary normal faults and implications for fault growth models: Geological Society, London, Special Publications, v. 439.
- Long, J. J., and Imber, J., 2010, Geometrically coherent continuous deformation in the volume surrounding a seismically imaged normal fault-array: *Journal of Structural Geology*, v. 32, no. 2, p. 222-234.
- Mansfield, C. S., and Cartwright, J. A., 1996, High resolution fault displacement mapping from three-dimensional seismic data: evidence for dip linkage during fault growth: *Journal of Structural Geology*, v. 18, no. 2-3, p. 249-263.
- Meyer, V., Nicol, A., Childs, C., Walsh, J. J., and Watterson, J., 2002, Progressive localisation of strain during the evolution of a normal fault population: *Journal of Structural Geology*, v. 24, no. 8, p. 1215-1231.
- Whipp, P. S., Jackson, C. A. L., Gawthorpe, R. L., Dreyer, T., and Quinn, D., 2014, Normal fault array evolution above a reactivated rift fabric; a subsurface example from the northern Horda Platform, Norwegian North Sea: *Basin Research*, v. 26, no. 4, p. 523-549.

## **Supplementary material**

**Figure DR1** – Map showing the locations of seismic reflection surveys used throughout this study

**Figure DR2** – Map showing the locations of the interpreted dike swarm. Black lines represent sections of seismic data where dike-related reflections were identified

**Figure DR3** – Uninterpreted seismic section for Figure 1c

**Figure DR4** – Uninterpreted seismic section for Figure 2b

**Figure DR5** – Uninterpreted seismic section for Figure 2c

**Figure DR6** – Uninterpreted seismic section for Figure 2d

**Table DR1** – Table showing the properties of the seismic reflection surveys used in this study

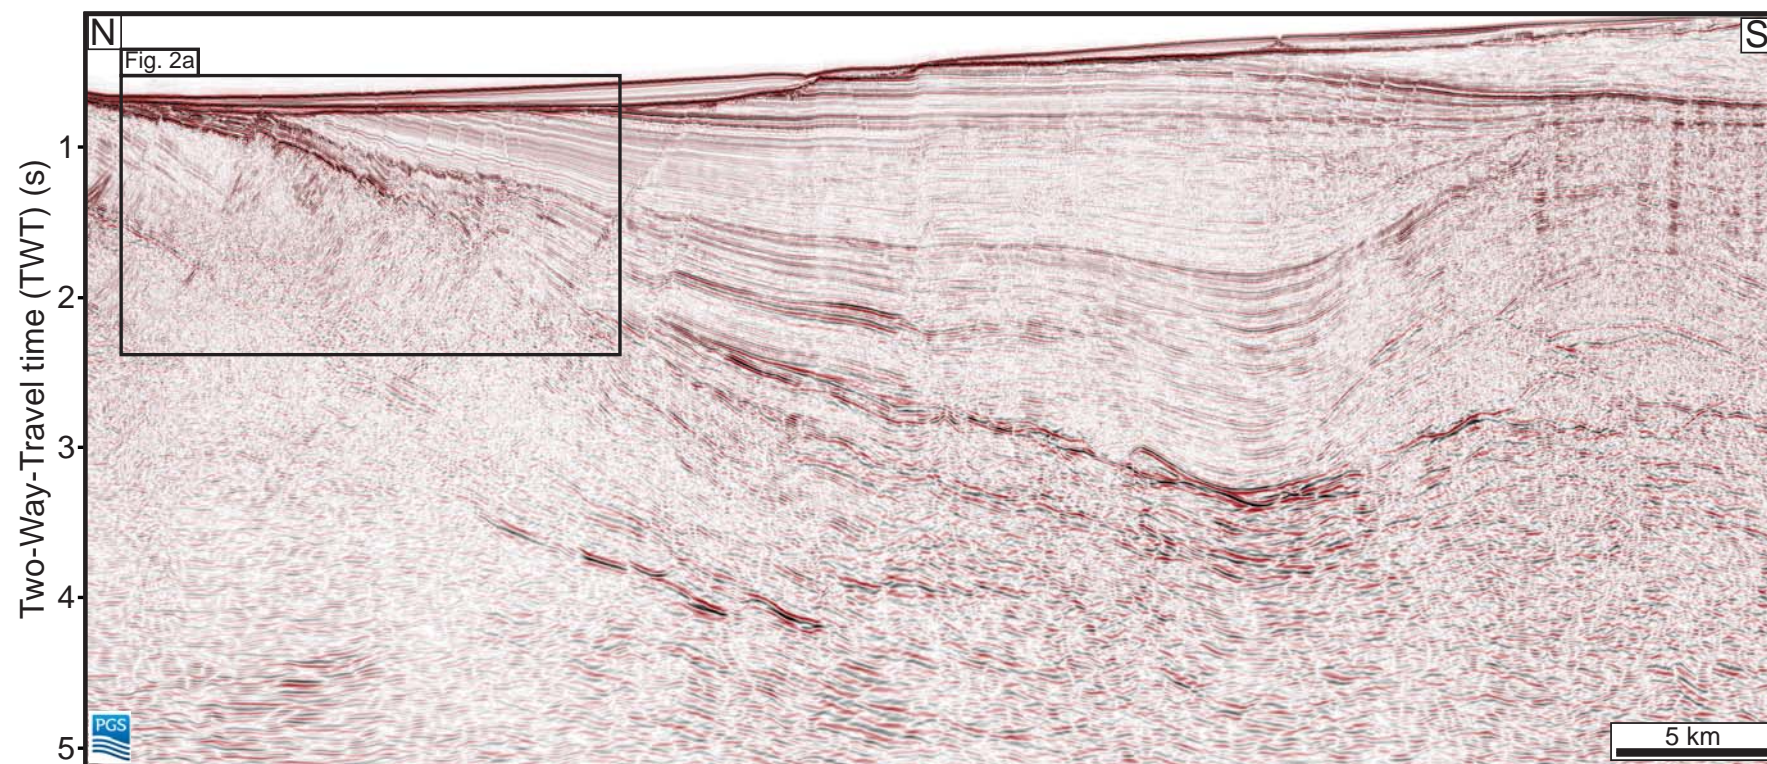

Fig. DR1

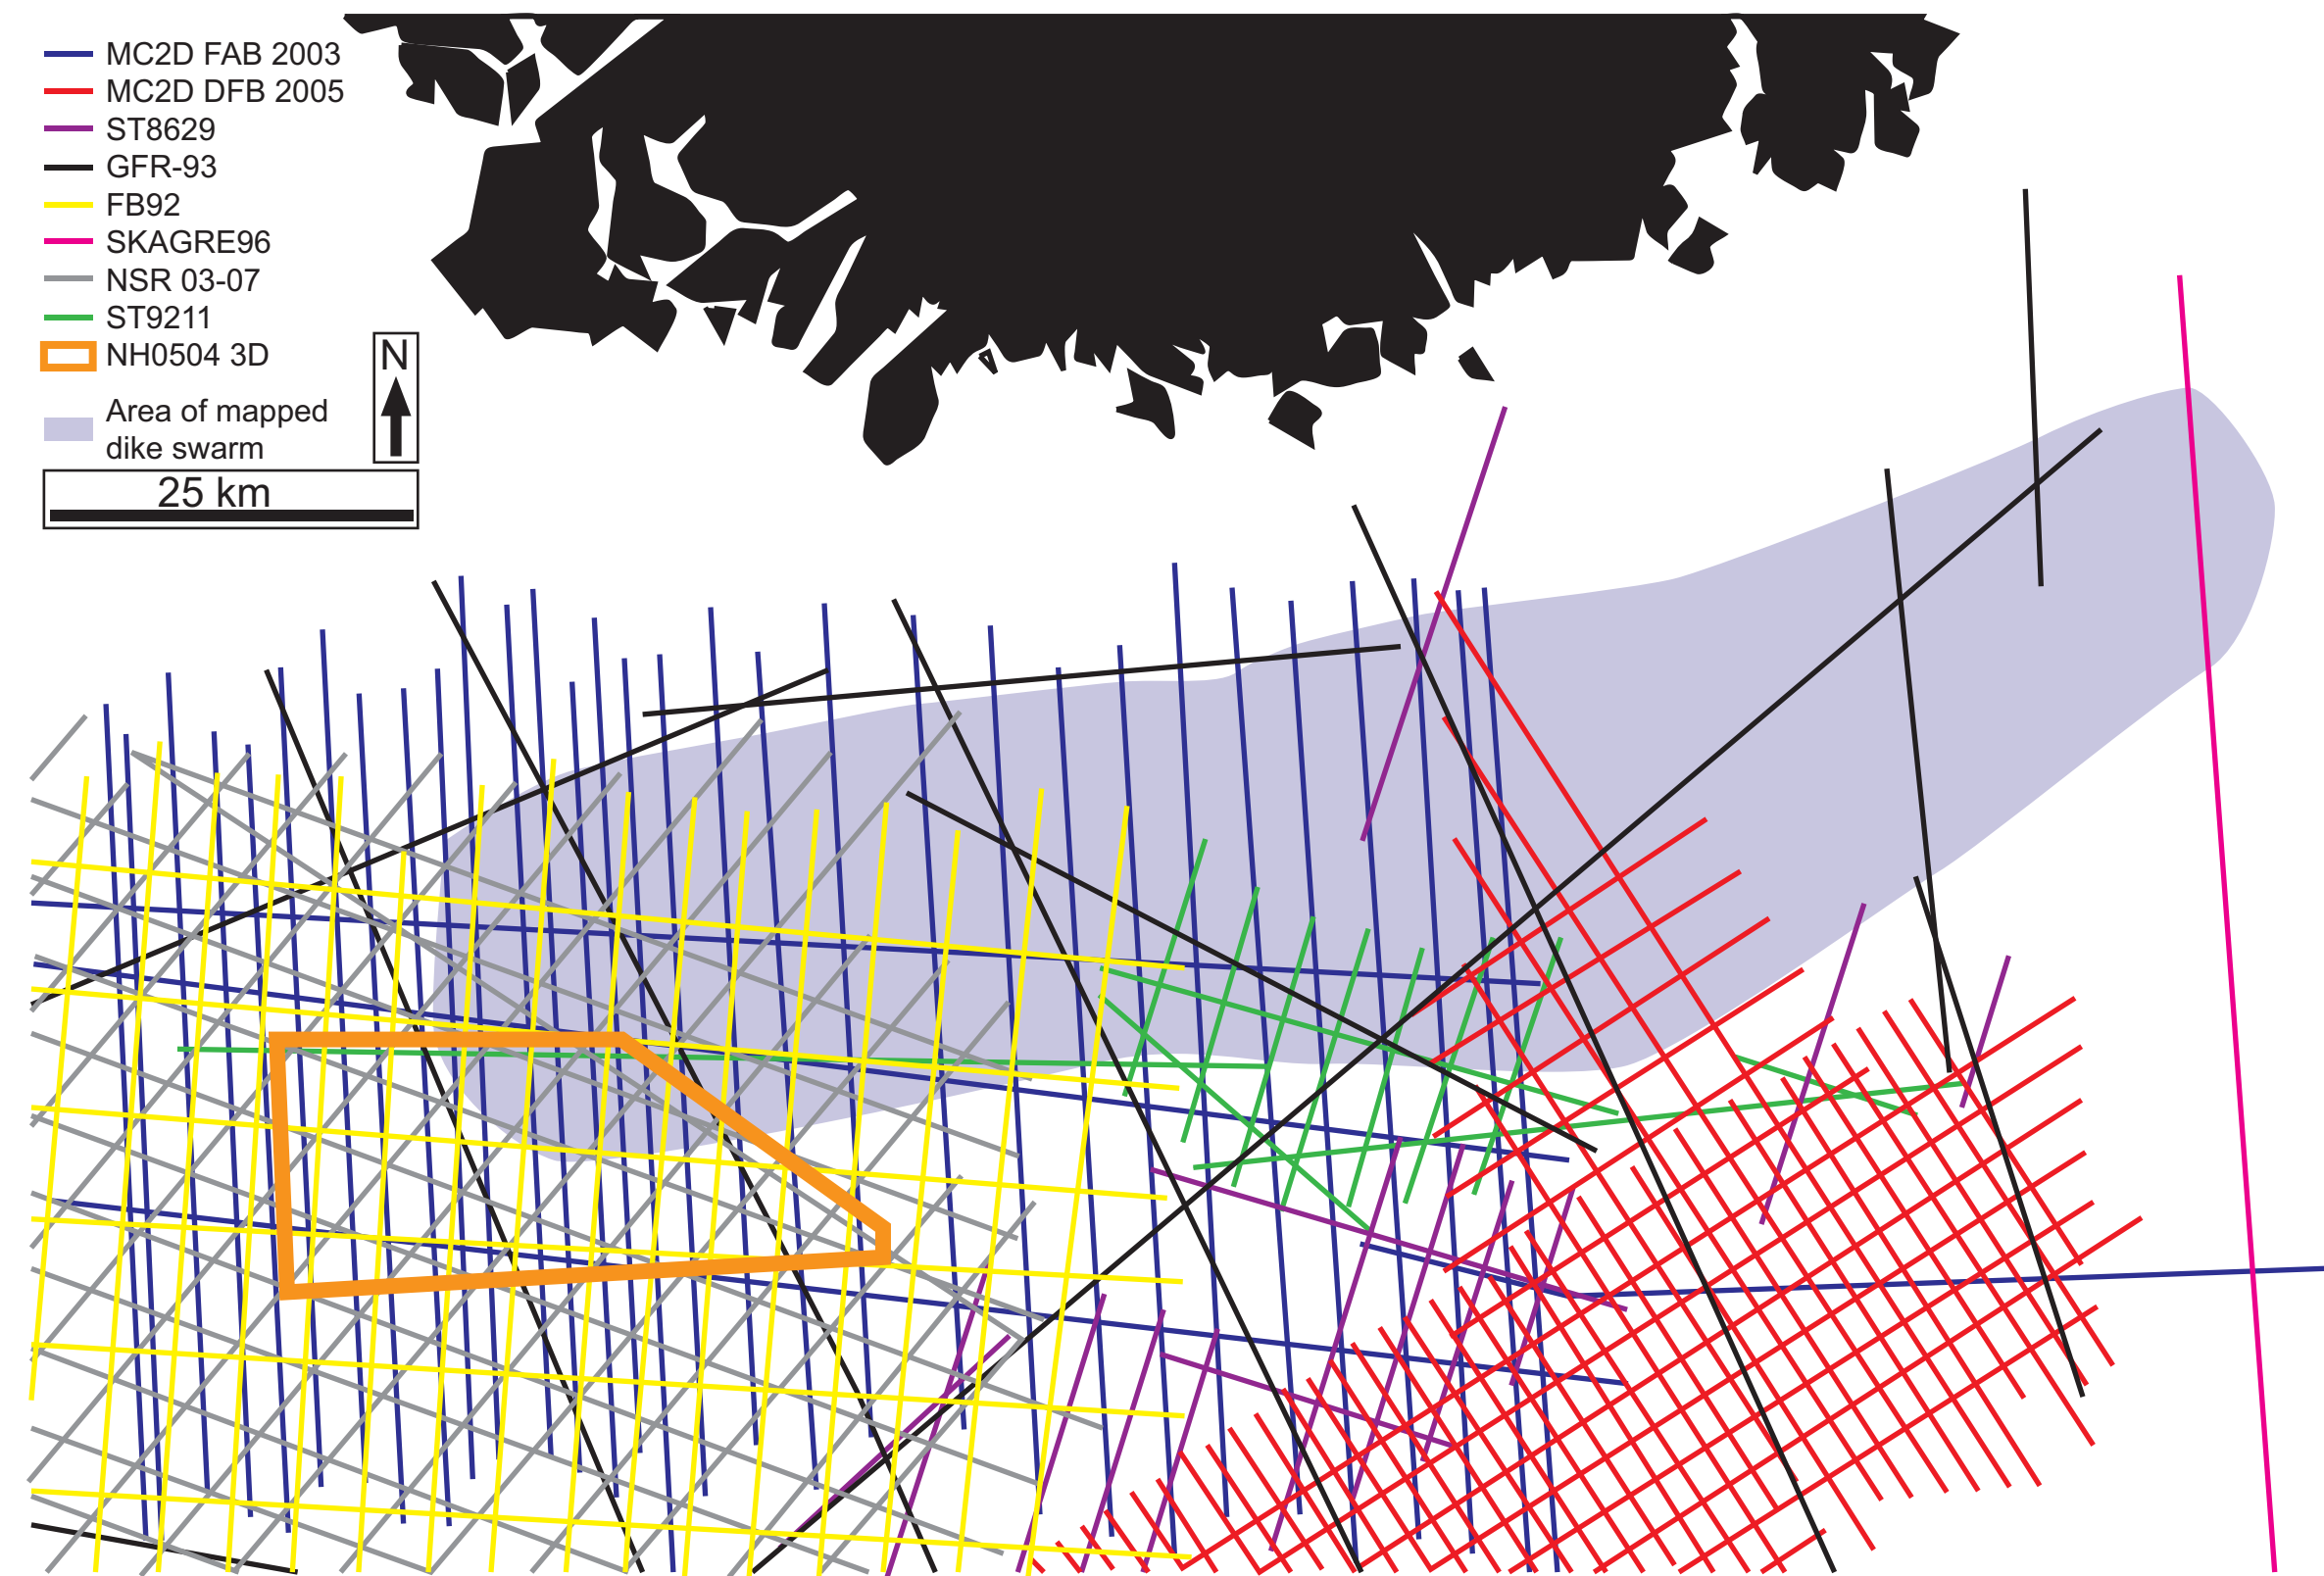

Figure DR2



Fig.  
DR3

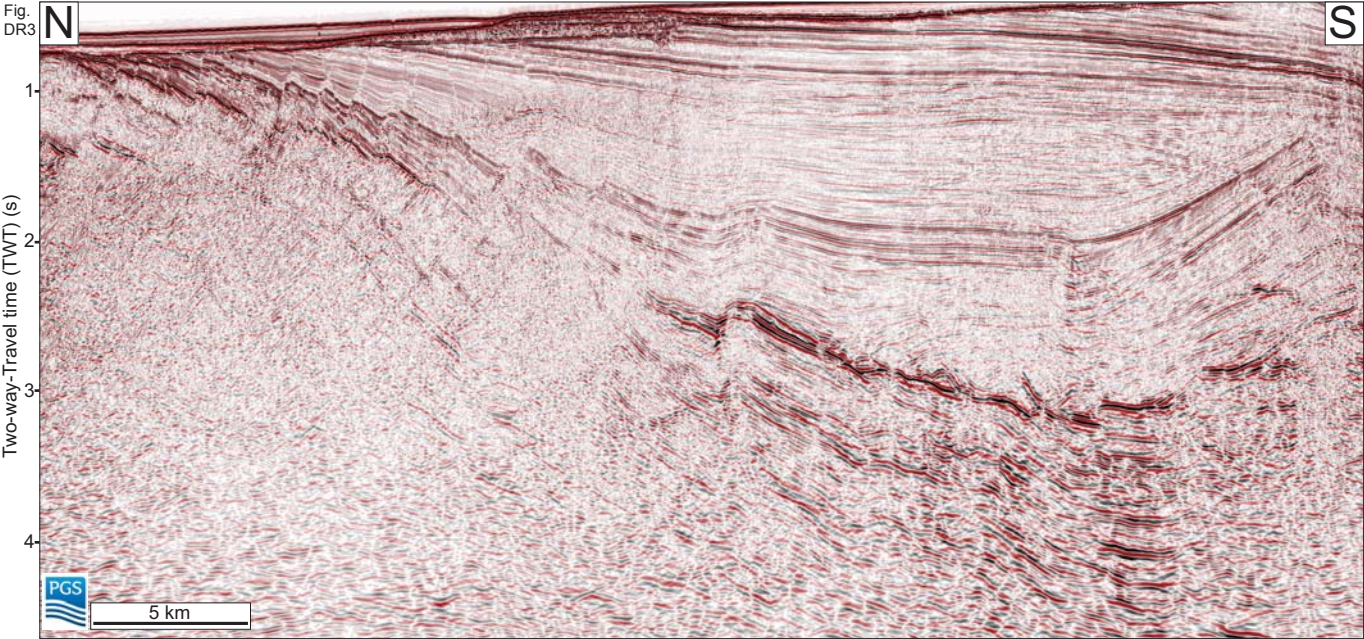

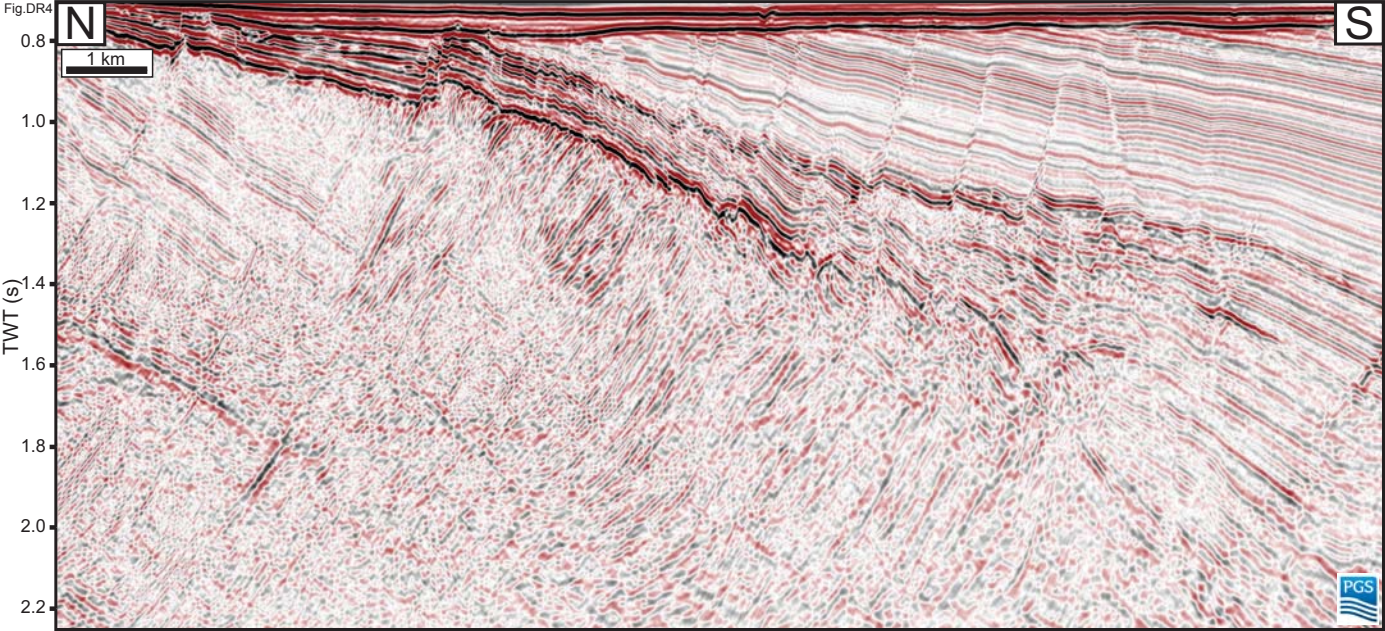



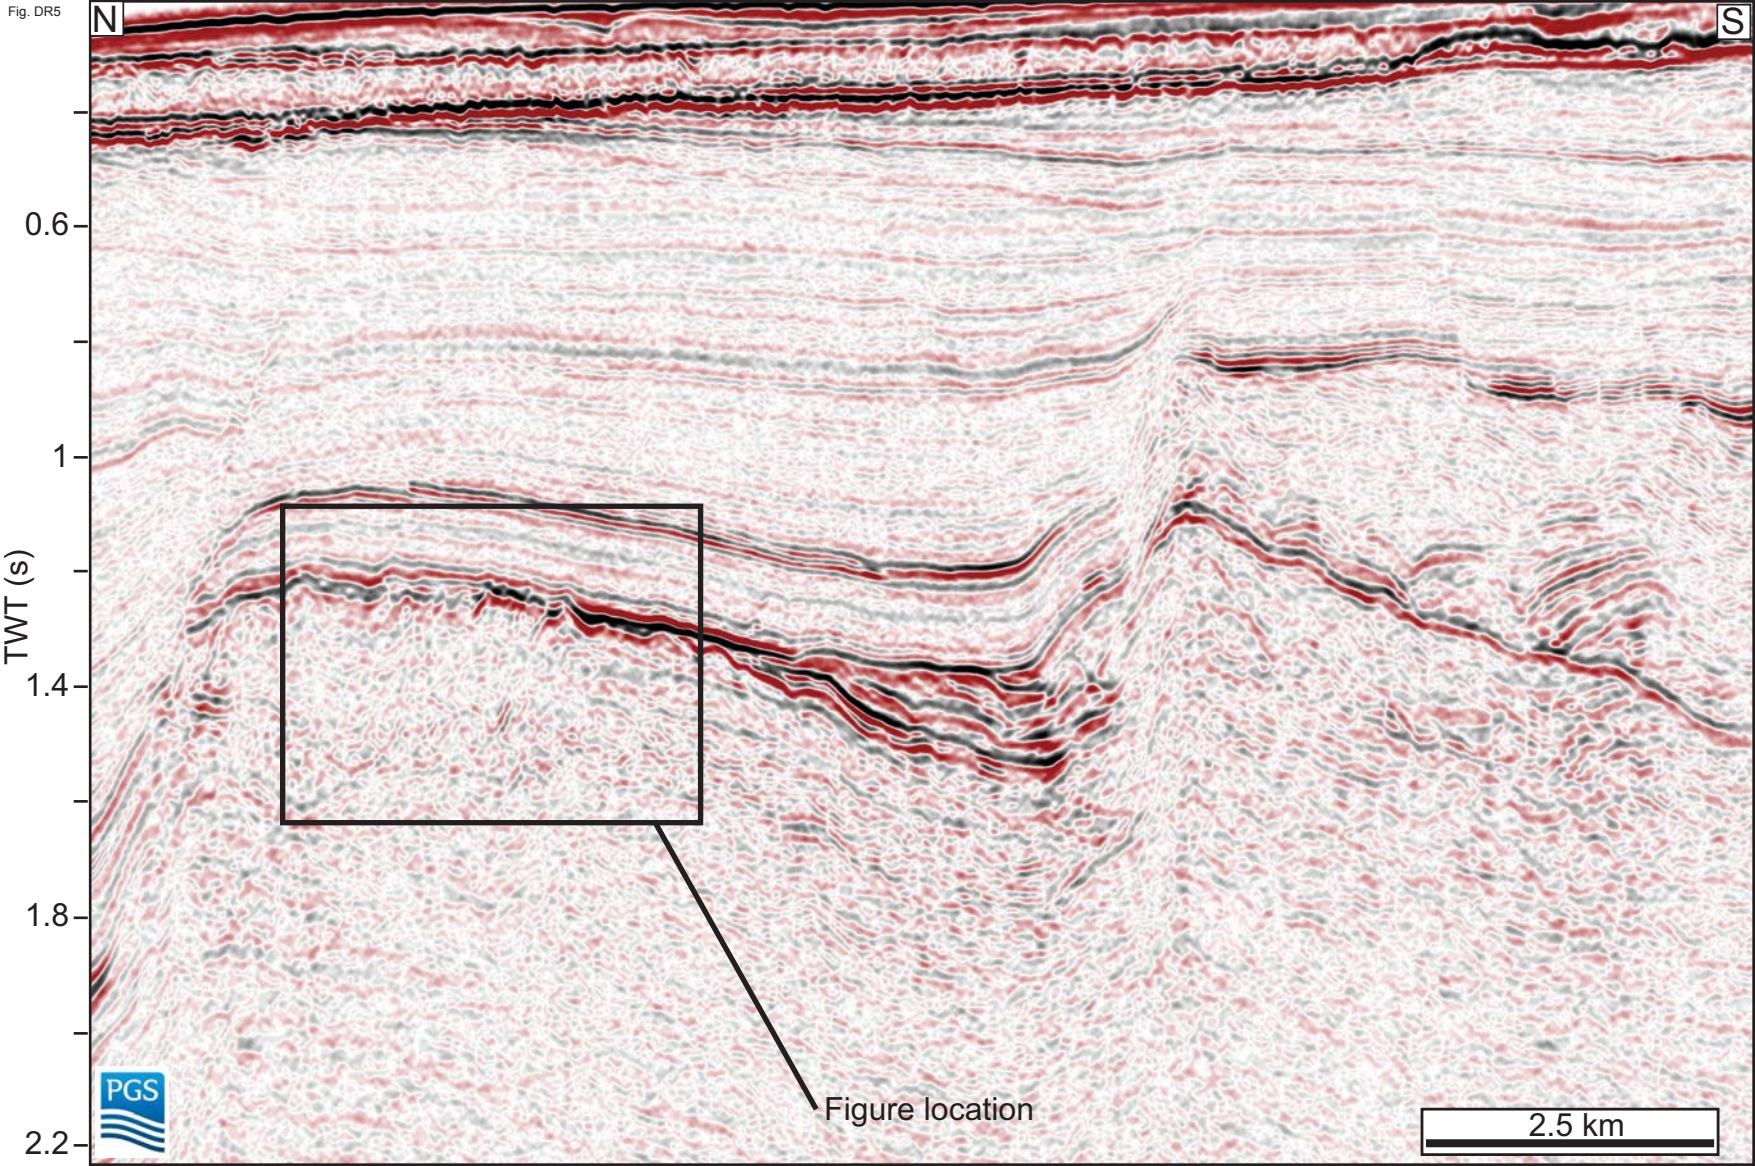



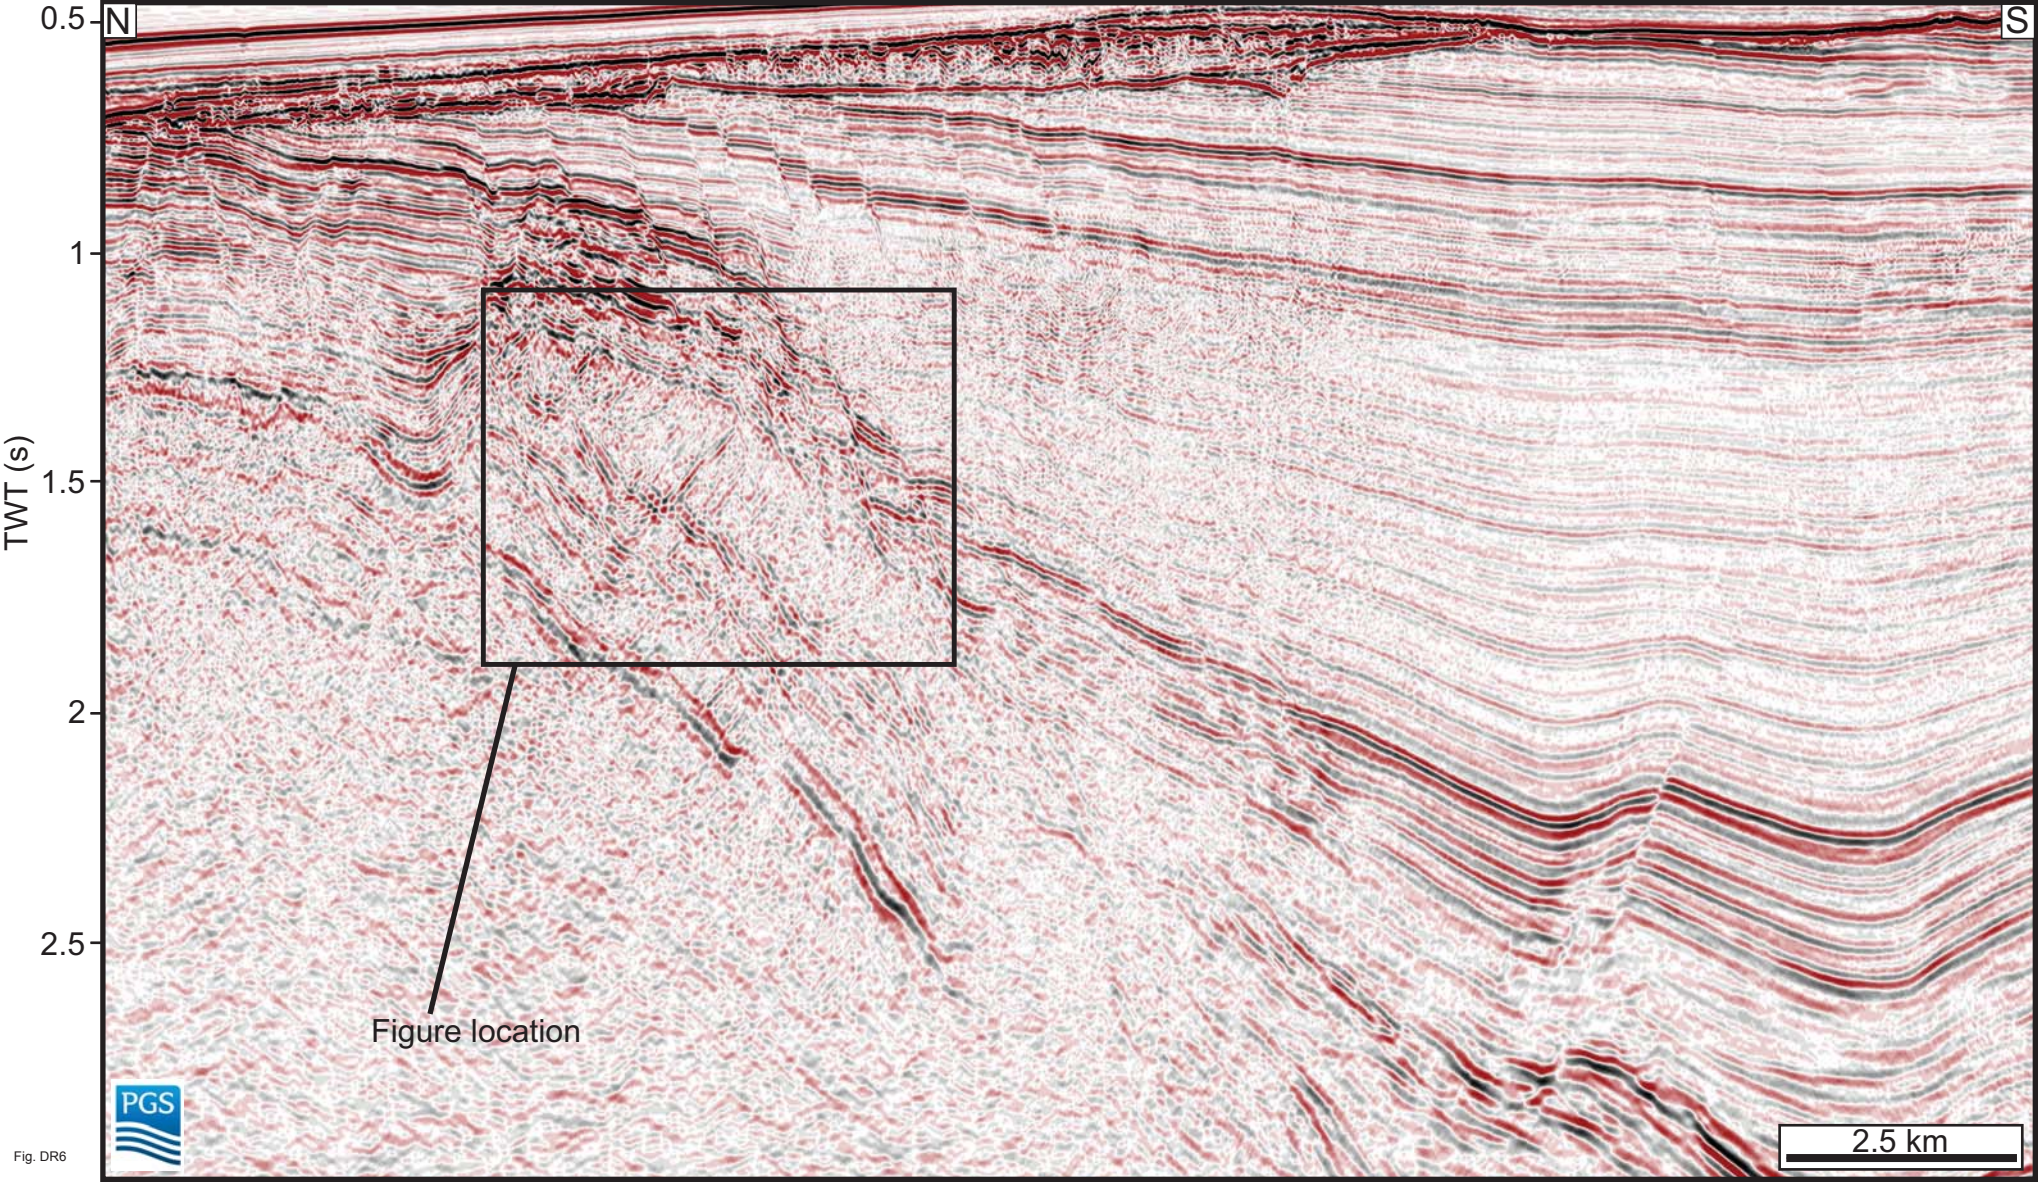

Fig. DR6



TABLE DR1

| Dataset       | Data type | Acquisition year | Record length (ms TWT) | Streamer length (m) | Fold | Shot interval (m) | Polarity (SEG convention)            | Processing steps |                            |
|---------------|-----------|------------------|------------------------|---------------------|------|-------------------|--------------------------------------|------------------|----------------------------|
| MC2D FAB 2003 | 2D        | 2003             | 7000                   | 6000                |      | 120               | 25 Reverse                           | 2D SRME          | Hi-Res Rad. Kirchhoff PSTM |
| MC2D DFB 2005 | 2D        | 2005             | 8000                   | 6000                | n/a  | n/a               | Reverse                              |                  |                            |
| ST8629        | 2D        | 1986             | 6000                   | N/A                 |      |                   | Reverse                              |                  |                            |
| GFR-93        | 2D        | 1993             | 12000                  | 4500                |      |                   | Reverse                              |                  |                            |
| FB92          | 2D        | 1992             | 6000                   | N/A                 |      |                   | Reverse                              |                  |                            |
| SKAGRE96      | 2D        | 1996             | 7000                   | 3000                |      |                   | Reverse                              |                  |                            |
| NSR03-07      | 2D        | 2003-2007        | 9216                   | 8087                |      |                   | Reverse                              |                  |                            |
| ST9211        | 2D        | 1992             | 7000                   | 3000                |      |                   | Reverse                              |                  |                            |
| NH0504        | 3D        | 2005             | 4040                   | 3000                |      |                   | Normal                               |                  |                            |
|               |           |                  |                        |                     |      | SRME              | Surface related multiple elimination |                  |                            |
